# Supplementary material
Source: publisher site journal article supplement (https://www.dovepress.com/article/209458)
Supplement: Supplementary file 1 [file get_supplementary_file.php]

## Supplementary Information

Repeated intravenous administration of silica nanoparticles induce pulmonary inflammation and collagen accumulation via JAK2/STAT3 and TGF- $\beta$ /Smad3 pathways in vivo

Yang Yu<sup>a,b</sup>, Tingting Zhu<sup>a</sup>, Yang Li<sup>a,b</sup>, Li Jing<sup>a,b</sup>, Man Yang<sup>a,b</sup>, Yanbo Li<sup>a,b</sup>, Junchao Duan<sup>a,b,\*</sup>, Zhiwei Sun<sup>a,b,\*</sup>

a Department of Toxicology and Sanitary Chemistry, School of Public Health, Capital Medical University, Beijing, P.R. China

b Beijing Key Laboratory of Environmental Toxicology, Capital Medical University, Beijing, P.R. China

\*Corresponding authors:

**Zhiwei Sun**, Department of Toxicology and Sanitary Chemistry, School of Public Health, Capital Medical University, Beijing100069, P.R. China. Tel: +86 010 83911507. E-mail: zwsun@ccmu.edu.cn

**Junchao Duan**, Department of Toxicology and Sanitary Chemistry, School of Public Health, Capital Medical University, Beijing100069, P.R. China. Tel: +86 010 83911868. E-mail: jcduan1128@ccmu.edu.cn

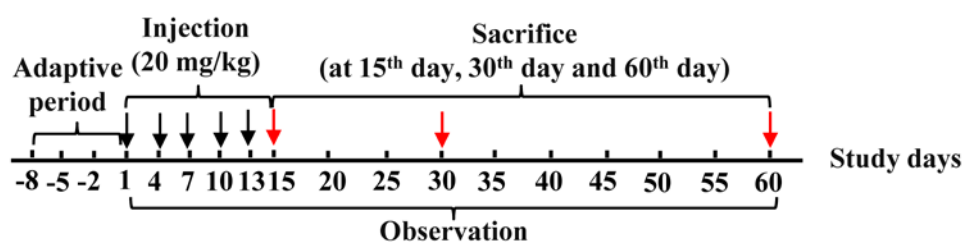

**Figure S1.** Experimental design of repeated exposure of SiNPs in ICR mice. Black arrows: SiNPs injection from 1<sup>st</sup> day to 13<sup>th</sup> day; Red arrows: scarification at 15<sup>th</sup> day, 30<sup>th</sup> day and 60<sup>th</sup> day.

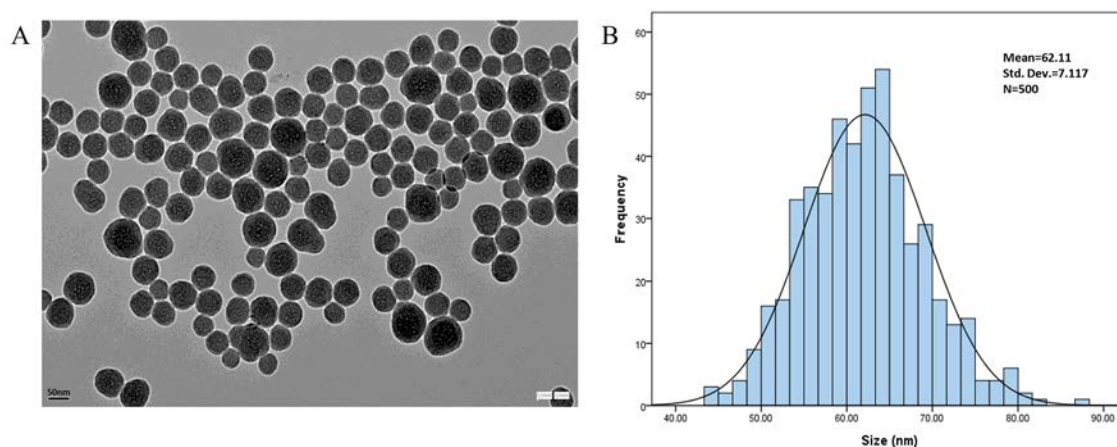

**Figure S2.** Characterization of SiNPs. (A) The SiNPs exhibited a near-spherical shape and were well dispersed. Scale bar: 50 nm. (B) The average diameter of SiNPs was  $62 \pm 7.1$  nm.

**Table S1 .**Hydrodynamic size and Zeta potential of SiNPs in dispersion media.

|     | Distilled water   |                    | Physiological saline |                     | DMEM              |                     |
|-----|-------------------|--------------------|----------------------|---------------------|-------------------|---------------------|
|     | Diameter (nm)     | Zeta potential(mV) | Diameter (nm)        | Zeta potential (mV) | Diameter (nm)     | Zeta potential (mV) |
| 1h  | 109.02 $\pm$ 3.54 | -43.51 $\pm$ 4.67  | 110.26 $\pm$ 4.81    | -39.44 $\pm$ 3.69   | 108.01 $\pm$ 1.43 | -40.13 $\pm$ 4.29   |
| 3h  | 107.92 $\pm$ 3.31 | -40.20 $\pm$ 2.13  | 108.93 $\pm$ 2.79    | -37.26 $\pm$ 2.50   | 109.22 $\pm$ 3.10 | -38.62 $\pm$ 2.76   |
| 6h  | 108.10 $\pm$ 2.23 | -42.53 $\pm$ 3.84  | 107.64 $\pm$ 2.33    | -40.30 $\pm$ 2.47   | 107.51 $\pm$ 2.07 | -40.05 $\pm$ 3.60   |
| 12h | 106.34 $\pm$ 1.67 | -43.11 $\pm$ 4.06  | 105.42 $\pm$ 3.01    | -38.11 $\pm$ 3.45   | 106.27 $\pm$ 4.09 | -38.74 $\pm$ 2.91   |
| 24h | 105.79 $\pm$ 2.51 | -44.45 $\pm$ 3.71  | 105.65 $\pm$ 2.18    | -37.70 $\pm$ 3.02   | 105.70 $\pm$ 2.44 | -39.10 $\pm$ 2.83   |

Data are expressed as means  $\pm$  S.D. from five independent experiments.

**Table S2.** Endotoxin detection by LAL assay

| Dosage    | Sample | Sample+Positive control | Positive control | Negative control |
|-----------|--------|-------------------------|------------------|------------------|
| 0.5 mg/mL | -      | +                       | +                | -                |
| 1 mg/mL   | -      | +                       | +                | -                |
| 3 mg/mL   | -      | +                       | +                | -                |
| 6 mg/mL   | -      | +                       | +                | -                |
| 12 mg/mL  | -      | +                       | +                | -                |
